# Supplementary material
Source: PubMed Central journal article supplement (PMC7251550)
Supplement: NIHMS1518073-supplement-1.pdf [file NIHMS1518073-supplement-1.pdf]

**Table S1. Catalog Numbers for Reagents Used**

| <b>Silencer Select siRNA Oligos</b>  |                  |                      |
|--------------------------------------|------------------|----------------------|
| <b>Gene</b>                          | <b>Catalog #</b> | <b>Manufacturer</b>  |
| Negative Control                     | 4390843          | Ambion/ ThermoFisher |
| HDAC8 #1                             | s31698           | Ambion/ ThermoFisher |
| HDAC8 #2                             | s31697           | Ambion/ ThermoFisher |
| HDAC9 #1                             | s18775           | Ambion/ ThermoFisher |
| HDAC9 #2                             | s18774           | Ambion/ ThermoFisher |
| FFAR2                                | s223804          | Ambion/ ThermoFisher |
| FFAR3                                | s230084          | Ambion/ ThermoFisher |
| HCAR2                                | s50344           | Ambion/ ThermoFisher |
| HDAC1                                | s73              | Ambion/ ThermoFisher |
| HDAC2                                | s6493            | Ambion/ ThermoFisher |
| HDAC3                                | s16878           | Ambion/ ThermoFisher |
|                                      |                  |                      |
| <b>BD OptEIA ELISA Kits</b>          |                  |                      |
| <b>Target</b>                        | <b>Catalog #</b> | <b>Manufacturer</b>  |
| IL-6                                 | BDB555220        | BD Biosciences       |
| IL-8                                 | BDB555244        | BD Biosciences       |
|                                      |                  |                      |
| <b>Taqman Gene Expression Assays</b> |                  |                      |
| <b>Gene</b>                          | <b>Catalog #</b> | <b>Manufacturer</b>  |
| GAPDH                                | Hs99999905_m1    | ABI/ ThermoFisher    |
| HDAC1                                | Hs02621185_s1    | ABI/ ThermoFisher    |
| HDAC2                                | Hs00231032_m1    | ABI/ ThermoFisher    |
| HDAC3                                | Hs00187320_m1    | ABI/ ThermoFisher    |
| HDAC4                                | Hs01041638_m1    | ABI/ ThermoFisher    |
| HDAC5                                | Hs00608366_m1    | ABI/ ThermoFisher    |
| HDAC6                                | Hs00195869_m1    | ABI/ ThermoFisher    |
| HDAC7                                | Hs00248789_m1    | ABI/ ThermoFisher    |
| HDAC8                                | Hs00954353_g1    | ABI/ ThermoFisher    |
| HDAC9                                | Hs00206843_m1    | ABI/ ThermoFisher    |
| HDAC10                               | Hs00368899_m1    | ABI/ ThermoFisher    |
| HDAC11                               | Hs00978041_m1    | ABI/ ThermoFisher    |
| FFAR2                                | Hs00271142_s1    | ABI/ ThermoFisher    |
| FFAR3                                | Hs02519193_g1    | ABI/ ThermoFisher    |
| HCAR2                                | Hs02341584_s1    | ABI/ ThermoFisher    |
| IL-1beta                             | Hs00174097_m1    | ABI/ ThermoFisher    |
| IL-6                                 | Hs00985639_m1    | ABI/ ThermoFisher    |
| IL-8                                 | Hs00174103_m1    | ABI/ ThermoFisher    |
| TNFalpha                             | Hs00174128_m1    | ABI/ ThermoFisher    |
| TSLP                                 | Hs00263639_m1    | ABI/ ThermoFisher    |
| CXCL2                                | Hs00601975_m1    | ABI/ ThermoFisher    |
| CXCL10                               | Hs00171042_m1    | ABI/ ThermoFisher    |

## Supplemental Figure 1.

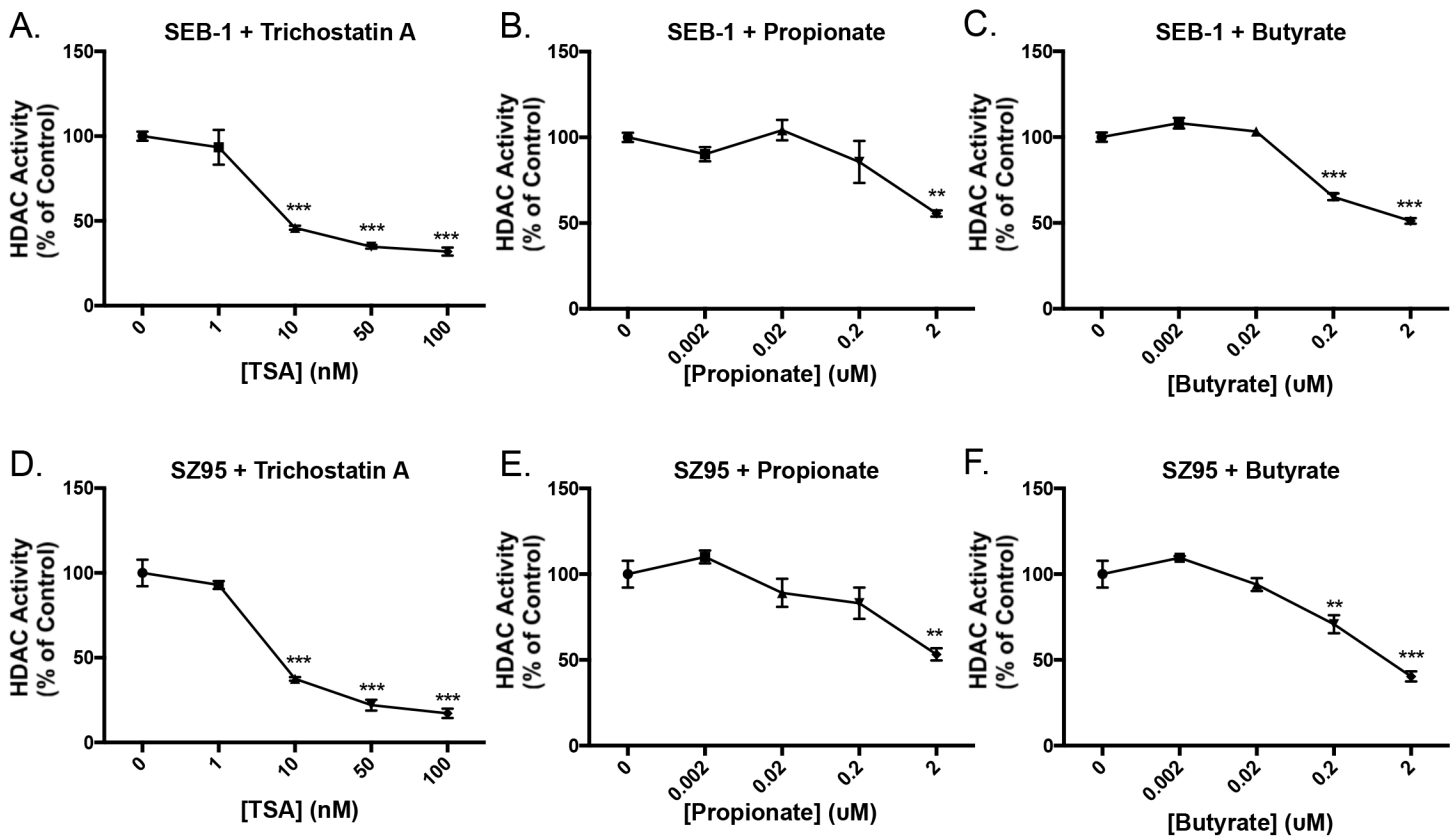

1 Supplemental Figure 1. Inhibition of HDAC activity in sebocytes by short-chain fatty  
2 acids. HDAC activity was measured in nuclear extracts of SEB-1 sebocytes (A-C) or SZ95  
3 sebocytes (D-F) incubated with increasing concentrations of Trichostatin A (A,D), propionate  
4 (B,E) or butyrate (C,F). HDAC activity was calculated as percentage of control (untreated)  
5 extracts for each cell type. Data shown are mean +/- SEM of one experiment representative of  
6 two independent experiments with n=2 for each condition. \*p<0.05; \*\*p<0.01; \*\*\*p<0.001 as  
7 determined by one-way ANOVA.

## Supplemental Figure 2.

### A. HDAC8 Silencing

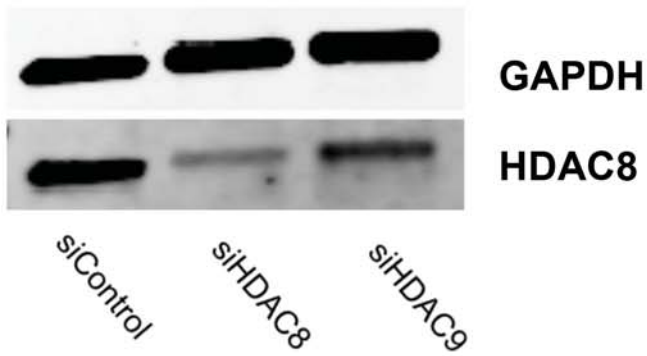

### B. HDAC8 Silencing

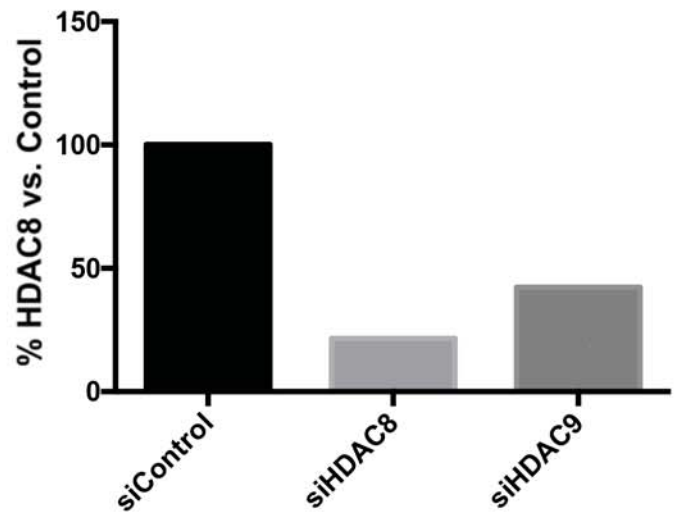

### C. HDAC9 Silencing

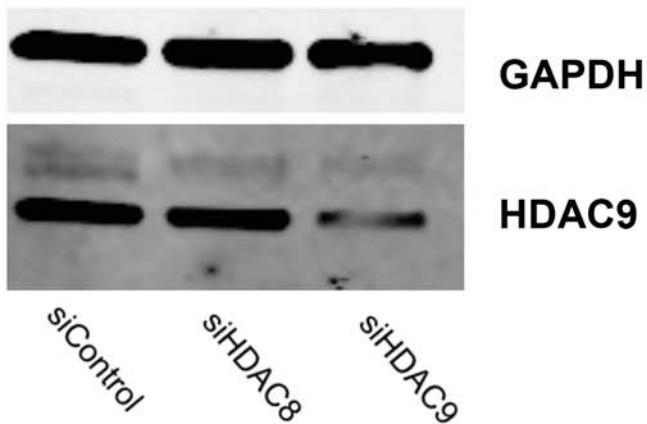

### D. HDAC9 Silencing

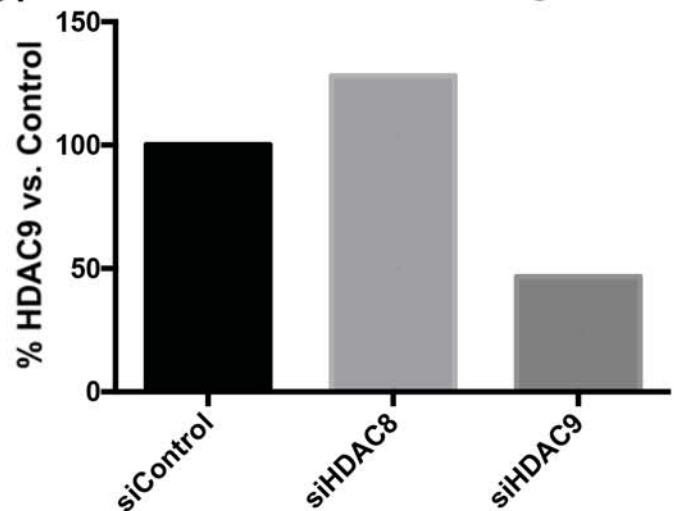

1

2 **Supplemental Figure 2. HDAC8 and HDAC9 depletion by siRNA.** SEB-1 sebocytes were  
3 treated with siRNA specific for HDAC8 or HDAC9 as described in the Materials and Methods  
4 section. Western blots were performed to measure the protein-level depletion of HDAC8 (A,B)  
5 and HDAC9 (C,D) and densitometry analysis was used to calculate the efficiency of knockdown  
6 relative to control siRNA-treated cells. Data is representative of three independent experiments.

7

### Supplemental Figure 3.

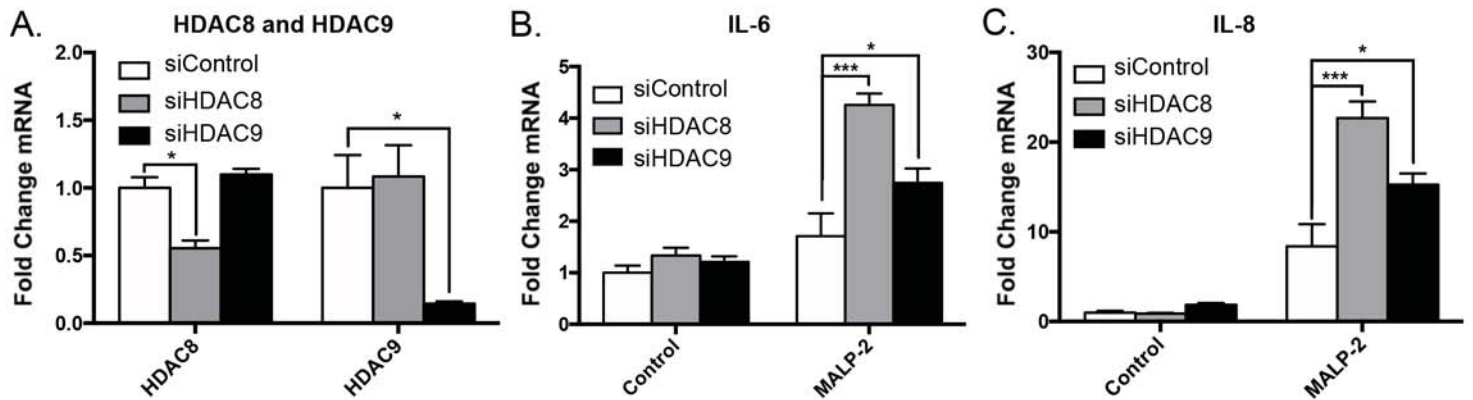

1

### 2 Supplemental Figure 3. Additional siRNA oligonucleotides used for depletion of HDAC8

3 and HDAC9 in sebocytes enhance cytokine response. SEB-1 sebocytes were treated with

4 siRNA oligonucleotides specific for HDAC8 or HDAC9, or a negative control. A) Measurement

5 of HDAC8 and HDAC9 expression levels, normalized to GAPDH levels, following treatment

6 with siRNA. B-C) Expression levels of IL-6 and IL-8 from sebocytes treated with the TLR2/6

7 ligand MALP-2 following siRNA-mediated depletion of HDAC8 or HDAC9 (transcript

8 abundances normalized to GAPDH). For graphs, data shown is mean +/- SEM for one

9 experiment representative of three independent experiments with n=3 for each condition.

10 \* $p < 0.05$ ; \*\* $p < 0.01$ ; \*\*\* $p < 0.001$  as determined by two-way ANOVA.

11

12
